# Supplementary material for: A lab in the field: high-frequency analysis of water quality and stable isotopes in stream water and precipitation
Source: Copernicus journal article supplement (doi:10.5194/hess-21-1721-2017), 2017-03-23
Supplement: Supplementary file 1 [file hess-21-1721-2017-supplement.zip]

10

- Data sets:

- “48-hour laboratory experiment CWS.csv” contains the isotope measurements of the 48-hour laboratory experiment.

- “48-hour laboratory experiment IC.csv” contains the IC measurements of the 48-hour laboratory experiment.

15

- “Field experiment corrected and calibrated data.csv” contains the drift-corrected and calibrated data of the field experiment (calcium data were not drift-corrected due to calcium-precipitation effects in the check standard solution).

- “Field experiment raw data.csv” contains the raw data of the field experiment

- “Precipitation CombiPrecip.csv” contains the precipitation data based on the CombiPrecip grid-data product of MeteoSwiss.

20

- “Ancillary data.csv” contains the measurements of stream stage, streamwater electrical conductivity, and streamwater temperature.

25

30

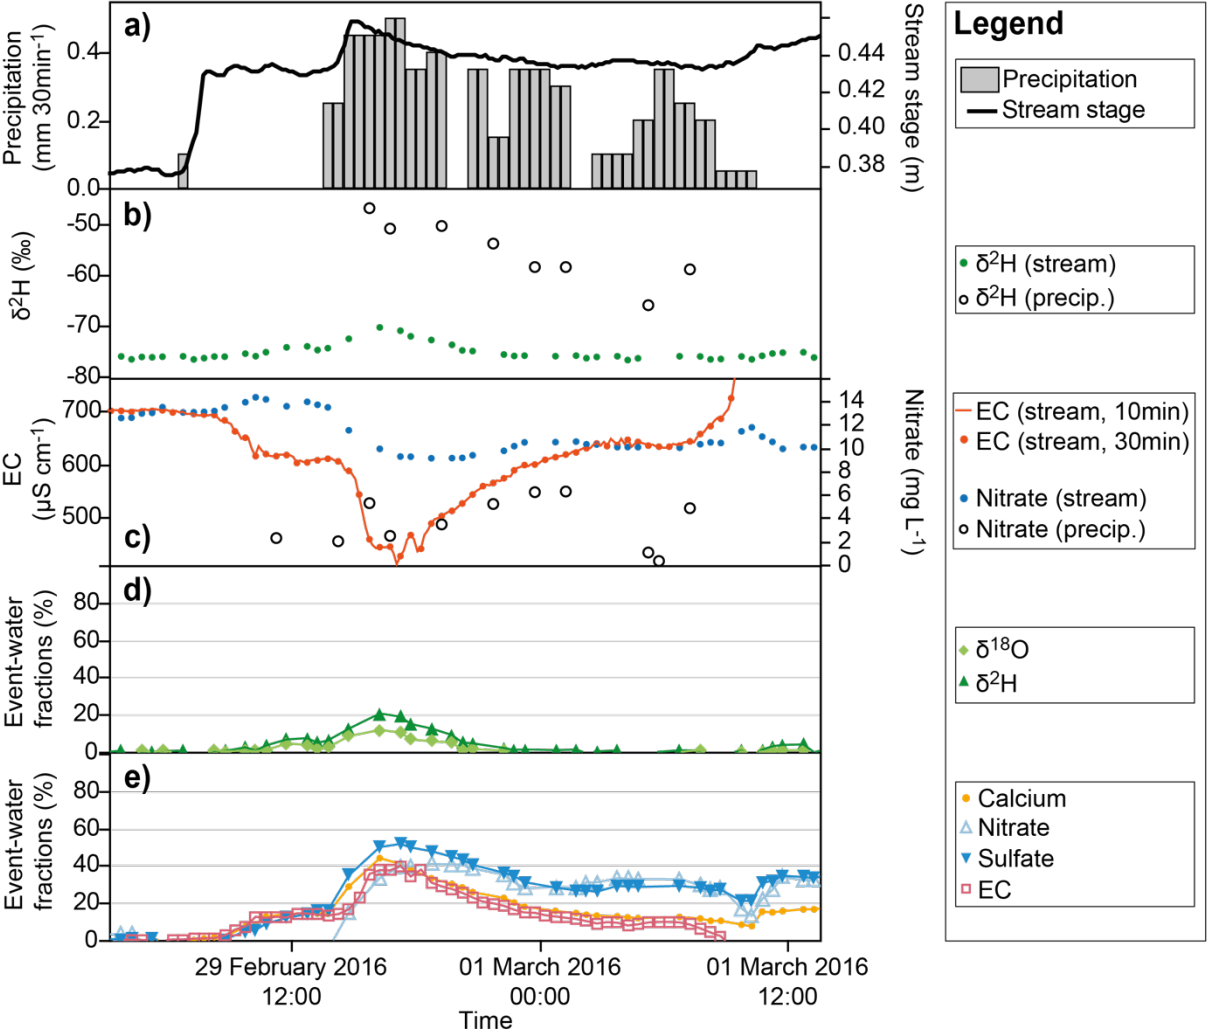

Figure S1: Precipitation Event #5 together with the hydrologic a), isotopic b) and chemical c) responses in streamwater. Panels d) and e) show the fractions of event-water based on isotopic hydrograph separation and chemical hydrograph separation, respectively, which are different for both types of tracers: While the isotope tracers yield event-water fractions smaller than 21%, chemical tracers estimated much larger event-water fractions of more than 40%.

Table S 1: End-members and event-water fractions during peak flow.

|       | $\delta^{18}\text{O}$ (‰)                                   | $\delta^2\text{H}$ (‰) | $\text{Ca}^{2+}$ (mg L <sup>-1</sup> ) | $\text{NO}_3^-$ (mg L <sup>-1</sup> ) | $\text{SO}_4^{2-}$ (mg L <sup>-1</sup> ) | EC ( $\mu\text{S cm}^{-1}$ )   |
|-------|-------------------------------------------------------------|------------------------|----------------------------------------|---------------------------------------|------------------------------------------|--------------------------------|
| Event | Pre-event-water end member ( $C_P$ ) $\pm SE_{CP}$          |                        |                                        |                                       |                                          |                                |
| #1    | -11.16 $\pm$ 0.08                                           | -77.22 $\pm$ 0.29      | 162.68 $\pm$ 1.60                      | 11.04 $\pm$ 0.24                      | 20.06 $\pm$ 1.25                         | 710.20 $\pm$ 14.57             |
| #2    | -10.81 $\pm$ 0.07                                           | -75.50 $\pm$ 0.29      | 166.58 $\pm$ 1.59                      | 13.62 $\pm$ 0.15                      | 23.98 $\pm$ 1.48                         | 718.00 $\pm$ 14.38             |
| #3    | -10.85 $\pm$ 0.03                                           | -75.55 $\pm$ 0.18      | 166.28 $\pm$ 1.62                      | 12.84 $\pm$ 0.10                      | 23.77 $\pm$ 1.47                         | 712.20 $\pm$ 14.27             |
| #4    | -10.92 $\pm$ 0.06                                           | -75.78 $\pm$ 0.34      | 158.00 $\pm$ 1.52                      | 11.53 $\pm$ 0.21                      | 21.95 $\pm$ 1.36                         | 669.80 $\pm$ 13.92             |
| #5    | -10.93 $\pm$ 0.03                                           | -76.26 $\pm$ 0.20      | 163.97 $\pm$ 1.66                      | 12.94 $\pm$ 0.18                      | 24.46 $\pm$ 1.51                         | 700.60 $\pm$ 14.02             |
| #6    | -11.36 $\pm$ 0.05                                           | -79.13 $\pm$ 0.26      | 142.07 $\pm$ 1.56                      | 8.50 $\pm$ 0.15                       | 15.20 $\pm$ 0.99                         | 586.00 $\pm$ 12.15             |
| #7    | -11.09 $\pm$ 0.03                                           | -77.61 $\pm$ 0.18      | 163.61 $\pm$ 1.57                      | 11.52 $\pm$ 0.12                      | 21.05 $\pm$ 1.30                         | 695.80 $\pm$ 13.99             |
| #8    | -11.16 $\pm$ 0.03                                           | -77.96 $\pm$ 0.19      | 167.56 $\pm$ 1.59                      | 12.14 $\pm$ 0.16                      | 22.34 $\pm$ 1.38                         | 708.60 $\pm$ 14.23             |
| Event | Event-water end member ( $C_E$ ) $\pm SE_{CE}$ at peak flow |                        |                                        |                                       |                                          |                                |
| #1    | -13.21 $\pm$ 0.36                                           | -91.34 $\pm$ 2.34      | 14.78 $\pm$ 4.32                       | 0.55 $\pm$ 0.28                       | 0.16 $\pm$ 0.08                          | 64.28 $\pm$ 26.86              |
| #2    | -5.25 $\pm$ 0.41                                            | -55.01 $\pm$ 3.16      | 14.55 $\pm$ 2.74                       | 1.41 $\pm$ 0.64                       | 1.07 $\pm$ 0.60                          | 14.05 $\pm$ 20.65              |
| #3    | -8.37 $\pm$ 0.74                                            | -62.05 $\pm$ 4.08      | 17.35 $\pm$ 1.26                       | 0.48 $\pm$ 0.13                       | 0.07 $\pm$ 0.04                          | 26.41 $\pm$ 20.29              |
| #4    | -10.99 $\pm$ 0.55                                           | -98.84 $\pm$ 4.37      | 9.26 $\pm$ 1.87                        | 1.94 $\pm$ 0.30                       | 0.05 $\pm$ 0.04                          | 4.94 $\pm$ 20.04               |
| #5    | -5.78 $\pm$ 0.10                                            | -47.64 $\pm$ 1.58      | 14.36 $\pm$ 1.05                       | 3.95 $\pm$ 0.63                       | 2.60 $\pm$ 0.66                          | 12.04 $\pm$ 20.08              |
| #6    | -12.04 $\pm$ 0.23                                           | -88.96 $\pm$ 1.54      | 6.03 $\pm$ 2.04                        | 0.27 $\pm$ 0.09                       | 0.05 $\pm$ 0.04                          | 8.90 $\pm$ 20.29               |
| #7    | -14.36 $\pm$ 1.19                                           | -133.59 $\pm$ 7.28     | 11.75 $\pm$ 2.16                       | 1.52 $\pm$ 0.50                       | 0.09 $\pm$ 0.05                          | 21.99 $\pm$ 21.07              |
| #8    | -15.87 $\pm$ 0.53                                           | -125.34 $\pm$ 3.00     | 10.48 $\pm$ 2.39                       | 2.46 $\pm$ 0.39                       | 0.18 $\pm$ 0.14                          | 17.35 $\pm$ 20.79              |
| Event | Streamwater end member ( $C_S$ ) $\pm SE_{CS}$ at peak flow |                        |                                        |                                       |                                          |                                |
| #1    | -11.43 $\pm$ 0.03                                           | -79.39 $\pm$ 0.17      | 114.90 $\pm$ 1.11                      | 8.60 $\pm$ 0.04                       | 15.72 $\pm$ 0.98                         | 414.00 $\pm$ 8.28              |
| #2    | -10.39 $\pm$ 0.03                                           | -72.41 $\pm$ 0.17      | 64.60 $\pm$ 0.66                       | 3.73 $\pm$ 0.03                       | 5.12 $\pm$ 0.34                          | 304.00 $\pm$ 6.08              |
| #3    | -9.65 $\pm$ 0.03                                            | -68.88 $\pm$ 0.17      | 96.38 $\pm$ 0.94                       | 7.36 $\pm$ 0.04                       | 13.63 $\pm$ 0.85                         | 363.00 $\pm$ 7.26              |
| #4    | -12.65 $\pm$ 0.03                                           | -89.72 $\pm$ 0.17      | 101.97 $\pm$ 0.99                      | 6.56 $\pm$ 0.04                       | 11.10 $\pm$ 0.70                         | 428.00 $\pm$ 8.56              |
| #5    | -10.32 $\pm$ 0.03                                           | -70.36 $\pm$ 0.17      | 98.23 $\pm$ 0.96                       | 9.94 $\pm$ 0.04                       | 13.56 $\pm$ 0.85                         | 442.00 $\pm$ 8.84              |
| #6    | -11.77 $\pm$ 0.03                                           | -82.40 $\pm$ 0.17      | 107.28 $\pm$ 1.04                      | 5.48 $\pm$ 0.04                       | 9.57 $\pm$ 0.61                          | 431.00 $\pm$ 8.62              |
| #7    | -15.89 $\pm$ 0.03                                           | -113.99 $\pm$ 0.17     | 88.22 $\pm$ 0.87                       | 4.62 $\pm$ 0.04                       | 7.98 $\pm$ 0.52                          | 380.00 $\pm$ 7.60              |
| #8    | -13.20 $\pm$ 0.03                                           | -92.12 $\pm$ 0.17      | 139.13 $\pm$ 1.33                      | 9.68 $\pm$ 0.04                       | 16.80 $\pm$ 1.05                         | 1369.00 $\pm$ 27.38            |
| Event | Event-water fraction $F_E \pm SE$ (%) at peak flow          |                        |                                        |                                       |                                          |                                |
|       | $\delta^{18}\text{O}$                                       | $\delta^2\text{H}$     | $\text{Ca}^{2+}$                       | $\text{NO}_3^-$                       | $\text{SO}_4^{2-}$                       | EC                             |
| #1    | 13.36 $\pm$ 4.28                                            | 15.40 $\pm$ 3.33       | 32.31 $\pm$ 1.41                       | 23.30 $\pm$ 1.89                      | 21.84 $\pm$ 6.95                         | 45.86 $\pm$ 2.60               |
| #2    | 7.64 $\pm$ 1.33                                             | 15.09 $\pm$ 2.75       | 67.08 $\pm$ 1.33                       | 80.98 $\pm$ 4.28                      | 82.33 $\pm$ 2.87                         | 58.81 $\pm$ 2.10               |
| #3    | 48.66 $\pm$ 14.64                                           | 49.36 $\pm$ 14.99      | 46.94 $\pm$ 0.95                       | 44.30 $\pm$ 0.72                      | 42.77 $\pm$ 5.05                         | 50.92 $\pm$ 2.11               |
| #4    | - <sup>a</sup>                                              | 60.45 $\pm$ 11.50      | 37.67 $\pm$ 1.04                       | 51.86 $\pm$ 1.99                      | 49.53 $\pm$ 4.48                         | 36.37 $\pm$ 2.15               |
| #5    | 11.77 $\pm$ 0.82                                            | 20.59 $\pm$ 1.40       | 43.94 $\pm$ 0.95                       | 33.39 $\pm$ 2.72                      | 49.87 $\pm$ 5.42                         | 37.56 $\pm$ 2.11               |
| #6    | 60.14 $\pm$ 21.00                                           | 33.30 $\pm$ 5.78       | 25.58 $\pm$ 1.21                       | 36.73 $\pm$ 1.33                      | 37.19 $\pm$ 5.75                         | 26.86 $\pm$ 2.34               |
| #7    | 146.70 $\pm$ 53.19                                          | 64.98 $\pm$ 8.46       | 49.64 $\pm$ 1.05                       | 69.04 $\pm$ 3.48                      | 62.36 $\pm$ 3.40                         | 46.87 $\pm$ 2.15               |
| #8    | 43.49 $\pm$ 4.97                                            | 29.89 $\pm$ 1.95       | 18.10 $\pm$ 1.21                       | 25.40 $\pm$ 1.64                      | 24.98 $\pm$ 6.64                         | -95.54 $\pm$ 6.34 <sup>b</sup> |

<sup>a</sup> Unrealistic event-water fractions were obtained because the  $\delta^{18}\text{O}$  signatures in precipitation and streamwater were too similar.

<sup>b</sup> Wash-off of road salt resulted in unrealistic event-water fractions based on EC.

Table S 2: End-members and event-water fractions during maximum event-water fraction.

|       | $\delta^{18}\text{O}$ (‰)                                                      | $\delta^2\text{H}$ (‰) | $\text{Ca}^{2+}$ (mg L <sup>-1</sup> ) | $\text{NO}_3^-$ (mg L <sup>-1</sup> ) | $\text{SO}_4^{2-}$ (mg L <sup>-1</sup> ) | EC ( $\mu\text{S cm}^{-1}$ )   |
|-------|--------------------------------------------------------------------------------|------------------------|----------------------------------------|---------------------------------------|------------------------------------------|--------------------------------|
| Event | Pre-event-water end member ( $C_P$ ) $\pm SE_{CP}$                             |                        |                                        |                                       |                                          |                                |
| #1    | -11.16 $\pm$ 0.08                                                              | -77.22 $\pm$ 0.29      | 162.68 $\pm$ 1.60                      | 11.04 $\pm$ 0.24                      | 20.06 $\pm$ 1.25                         | 710.20 $\pm$ 14.57             |
| #2    | -10.81 $\pm$ 0.07                                                              | -75.50 $\pm$ 0.29      | 166.58 $\pm$ 1.59                      | 13.62 $\pm$ 0.15                      | 23.98 $\pm$ 1.48                         | 718.00 $\pm$ 14.38             |
| #3    | -10.85 $\pm$ 0.03                                                              | -75.55 $\pm$ 0.18      | 166.28 $\pm$ 1.62                      | 12.84 $\pm$ 0.10                      | 23.77 $\pm$ 1.47                         | 712.20 $\pm$ 14.27             |
| #4    | -10.92 $\pm$ 0.06                                                              | -75.78 $\pm$ 0.34      | 158.00 $\pm$ 1.52                      | 11.53 $\pm$ 0.21                      | 21.95 $\pm$ 1.36                         | 669.80 $\pm$ 13.92             |
| #5    | -10.93 $\pm$ 0.03                                                              | -76.26 $\pm$ 0.20      | 163.97 $\pm$ 1.66                      | 12.94 $\pm$ 0.18                      | 24.46 $\pm$ 1.51                         | 700.60 $\pm$ 14.02             |
| #6    | -11.36 $\pm$ 0.05                                                              | -79.13 $\pm$ 0.26      | 142.07 $\pm$ 1.56                      | 8.50 $\pm$ 0.15                       | 15.20 $\pm$ 0.99                         | 586.00 $\pm$ 12.15             |
| #7    | -11.09 $\pm$ 0.03                                                              | -77.61 $\pm$ 0.18      | 163.61 $\pm$ 1.57                      | 11.52 $\pm$ 0.12                      | 21.05 $\pm$ 1.30                         | 695.80 $\pm$ 13.99             |
| #8    | -11.16 $\pm$ 0.03                                                              | -77.96 $\pm$ 0.19      | 167.56 $\pm$ 1.59                      | 12.14 $\pm$ 0.16                      | 22.34 $\pm$ 1.38                         | 708.60 $\pm$ 14.23             |
| Event | Event-water end member ( $C_E$ ) $\pm SE_{CE}$ at maximum event-water fraction |                        |                                        |                                       |                                          |                                |
| #1    | -13.17 $\pm$ 0.27                                                              | -96.54 $\pm$ 4.42      | 14.65 $\pm$ 3.07                       | 0.4 $\pm$ 0.23                        | 0.13 $\pm$ 0.07                          | 55.09 $\pm$ 25.08              |
| #2    | -5.25 $\pm$ 0.41                                                               | -55.01 $\pm$ 3.16      | 14.55 $\pm$ 2.74                       | 1.41 $\pm$ 0.64                       | 1.07 $\pm$ 0.60                          | 15.57 $\pm$ 20.81              |
| #3    | -8.37 $\pm$ 0.74                                                               | -62.05 $\pm$ 4.08      | 15.6 $\pm$ 1.30                        | 0.39 $\pm$ 0.14                       | 0.07 $\pm$ 0.04                          | 24.86 $\pm$ 20.47              |
| #4    | -10.68 $\pm$ 0.55                                                              | -95.95 $\pm$ 4.56      | 9.36 $\pm$ 1.65                        | 1.84 $\pm$ 0.29                       | 0.05 $\pm$ 0.04                          | 4.15 $\pm$ 20.03               |
| #5    | -5.78 $\pm$ 0.10                                                               | -47.64 $\pm$ 1.58      | 14.36 $\pm$ 1.05                       | 3.6 $\pm$ 0.34                        | 1.97 $\pm$ 0.60                          | 9.17 $\pm$ 20.07               |
| #6    | -12.04 $\pm$ 0.23                                                              | -88.96 $\pm$ 1.54      | 6.03 $\pm$ 2.04                        | 0.27 $\pm$ 0.09                       | 0.05 $\pm$ 0.04                          | 9.01 $\pm$ 20.29               |
| #7    | -14.36 $\pm$ 1.19                                                              | -133.59 $\pm$ 7.28     | 11.75 $\pm$ 2.16                       | 1.52 $\pm$ 0.50                       | 0.08 $\pm$ 0.05                          | 19.68 $\pm$ 21.12              |
| #8    | -15.87 $\pm$ 0.53                                                              | -125.34 $\pm$ 3.00     | 10.35 $\pm$ 9.73                       | 2.5 $\pm$ 0.68                        | 0.15 $\pm$ 1.19                          | 16.53 $\pm$ 20.79              |
| Event | Streamwater end member ( $C_S$ ) $\pm SE_{CS}$ at maximum event-water fraction |                        |                                        |                                       |                                          |                                |
| #1    | -12.77 $\pm$ 0.03                                                              | -88.67 $\pm$ 0.17      | 78.00 $\pm$ 0.78                       | 4.16 $\pm$ 0.15                       | 7.12 $\pm$ 0.46                          | 343.00 $\pm$ 7.16              |
| #2    | -10.39 $\pm$ 0.03                                                              | -72.41 $\pm$ 0.17      | 64.60 $\pm$ 0.66                       | 3.73 $\pm$ 0.03                       | 5.12 $\pm$ 0.34                          | 264.00 $\pm$ 5.28              |
| #3    | -9.65 $\pm$ 0.03                                                               | -68.88 $\pm$ 0.17      | 89.92 $\pm$ 0.89                       | 6.26 $\pm$ 0.04                       | 10.52 $\pm$ 0.67                         | 346.00 $\pm$ 6.92              |
| #4    | -12.78 $\pm$ 0.03                                                              | -90.53 $\pm$ 0.17      | 90.82 $\pm$ 0.90                       | 5.39 $\pm$ 0.04                       | 8.00 $\pm$ 0.52                          | 347.00 $\pm$ 6.94              |
| #5    | -10.32 $\pm$ 0.03                                                              | -70.36 $\pm$ 0.17      | 98.23 $\pm$ 0.96                       | 9.13 $\pm$ 0.04                       | 12.86 $\pm$ 0.81                         | 425.00 $\pm$ 8.50              |
| #6    | -11.77 $\pm$ 0.03                                                              | -82.40 $\pm$ 0.17      | 107.28 $\pm$ 1.04                      | 5.48 $\pm$ 0.04                       | 9.57 $\pm$ 0.61                          | 336.00 $\pm$ 6.72              |
| #7    | -15.89 $\pm$ 0.03                                                              | -113.99 $\pm$ 0.17     | 88.22 $\pm$ 0.87                       | 4.62 $\pm$ 0.04                       | 7.59 $\pm$ 0.49                          | 366.00 $\pm$ 7.32              |
| #8    | -13.20 $\pm$ 0.03                                                              | -92.12 $\pm$ 0.17      | 130.86 $\pm$ 1.25                      | 9.06 $\pm$ 0.04                       | 14.83 $\pm$ 0.93                         | 1369.00 $\pm$ 27.38            |
| Event | Maximum event-water fraction $F_{E,\max}$ $\pm SE_{FE}$ (%)                    |                        |                                        |                                       |                                          |                                |
|       | $\delta^{18}\text{O}$                                                          | $\delta^2\text{H}$     | $\text{Ca}^{2+}$                       | $\text{NO}_3^-$                       | $\text{SO}_4^{2-}$                       | EC                             |
| #1    | 80.21 $\pm$ 10.75                                                              | 59.28 $\pm$ 13.61      | 57.20 $\pm$ 1.38                       | 64.63 $\pm$ 2.14                      | 64.95 $\pm$ 3.21                         | 56.05 $\pm$ 2.60               |
| #2    | 7.64 $\pm$ 1.33                                                                | 15.09 $\pm$ 2.75       | 67.08 $\pm$ 1.33                       | 80.98 $\pm$ 4.28                      | 82.33 $\pm$ 2.87                         | 64.63 $\pm$ 2.18               |
| #3    | 48.66 $\pm$ 14.64                                                              | 49.36 $\pm$ 14.99      | 50.68 $\pm$ 0.91                       | 52.85 $\pm$ 0.76                      | 55.91 $\pm$ 3.92                         | 53.28 $\pm$ 2.11               |
| #4    | <sup>a</sup>                                                                   | 73.11 $\pm$ 16.55      | 45.20 $\pm$ 0.96                       | 63.32 $\pm$ 2.07                      | 63.72 $\pm$ 3.26                         | 48.49 $\pm$ 2.09               |
| #5    | 11.77 $\pm$ 0.82                                                               | 20.59 $\pm$ 1.4        | 43.94 $\pm$ 0.95                       | 40.74 $\pm$ 1.91                      | 51.58 $\pm$ 5.03                         | 39.86 $\pm$ 2.08               |
| #6    | 60.14 $\pm$ 21.00                                                              | 33.30 $\pm$ 5.78       | 25.58 $\pm$ 1.21                       | 36.73 $\pm$ 1.33                      | 37.19 $\pm$ 5.75                         | 43.33 $\pm$ 2.26               |
| #7    | 146.70 $\pm$ 53.19                                                             | 64.98 $\pm$ 8.46       | 49.64 $\pm$ 1.05                       | 69.04 $\pm$ 3.48                      | 64.18 $\pm$ 3.24                         | 48.78 $\pm$ 2.15               |
| #8    | 43.49 $\pm$ 4.97                                                               | 29.89 $\pm$ 1.95       | 23.34 $\pm$ 1.82                       | 31.95 $\pm$ 2.55                      | 33.82 $\pm$ 6.13                         | -95.42 $\pm$ 6.33 <sup>b</sup> |

<sup>a</sup> Unrealistic event-water fractions were obtained because the  $\delta^{18}\text{O}$  signatures in precipitation and streamwater were too similar.

<sup>b</sup> Wash-off of road salt resulted in unrealistic event-water fractions based on EC.
