# Supplementary material for: A lab in the field: high-frequency analysis of water quality and stable isotopes in stream water and precipitation
Source: Copernicus journal article supplement (doi:10.5194/hess-21-1721-2017), 2017-03-23
Supplement: Supplementary file 2 [file hess-21-1721-2017-supplement.zip]

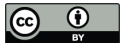

## *Supplement of*

# **A lab in the field: high-frequency analysis of water quality and stable isotopes in stream water and precipitation**

**Jana von Freyberg et al.**

*Correspondence to:* Jana von Freyberg (jana.vonfreyberg@usys.ethz.ch)

- hess-21-1721-2017-supplement-title-page.pdf
- Supplement\_DataSet
  - 48-hour laboratory experiment CWS.csv
  - 48-hour laboratory experiment IC.csv
  - Ancillary data.csv
  - Field experiment corrected and calibrated data.csv
  - Field experiment raw data.csv
  - Precipitation CombiPrecip.csv
- hess-2016-585-Supplement-version2.pdf

The copyright of individual parts of the supplement might differ from the CC-BY 3.0 licence.
